# Supplementary material for: Emission spectra profiling of fluorescent proteins in living plant cells
Source: PubMed Central journal article supplement (PMC3630006; doi:10.1186/1746-4811-9-10), 2013-04-03

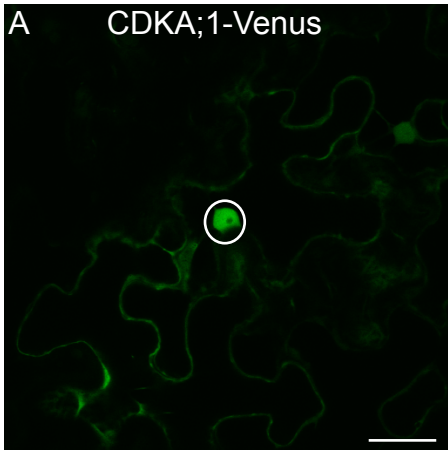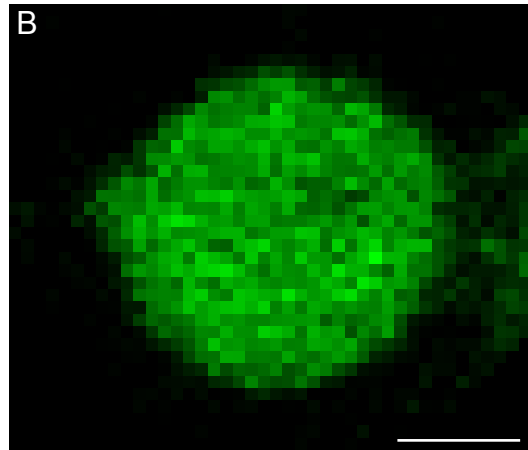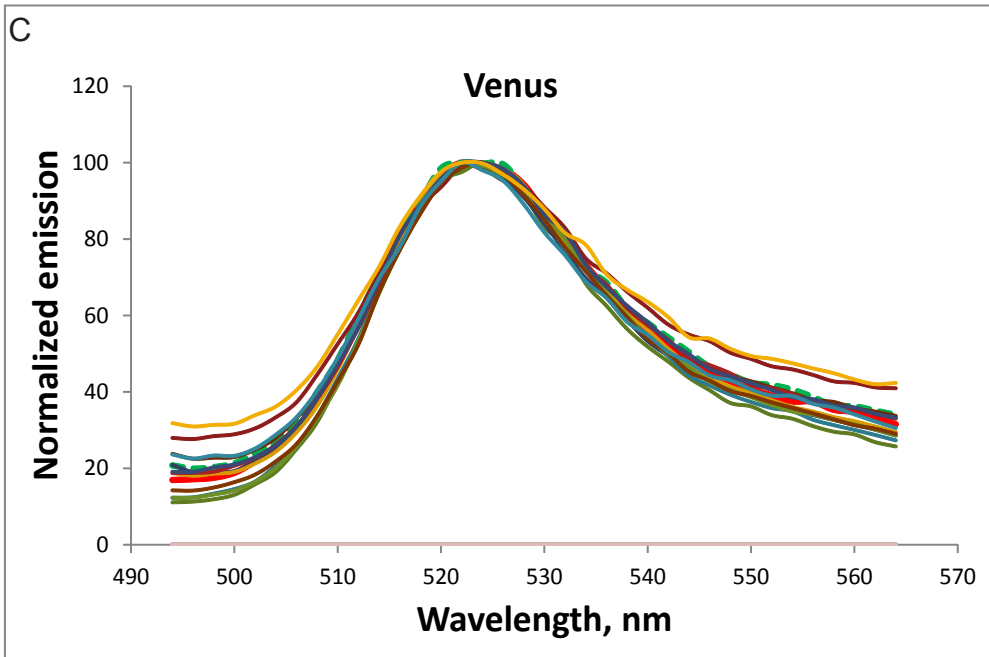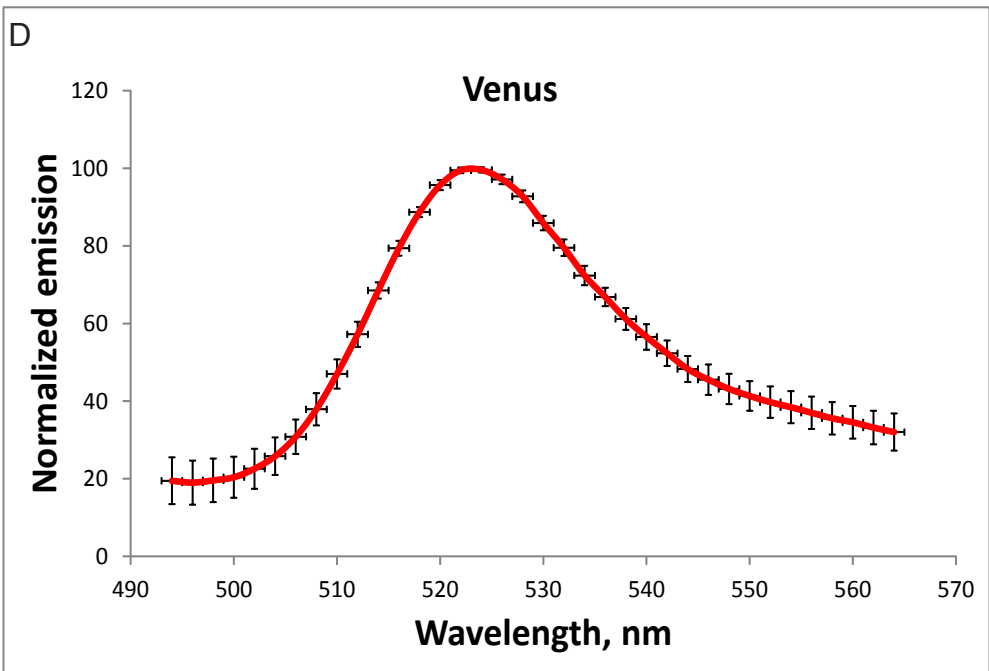

Supplement: 1746-4811-9-10-S2.pdf [file 1746-4811-9-10-S2.pdf]
