# Supplementary material for: Emission spectra profiling of fluorescent proteins in living plant cells
Source: PubMed Central journal article supplement (PMC3630006; doi:10.1186/1746-4811-9-10), 2013-04-03
Supplement: 1746-4811-9-10-S4.pdf [file 1746-4811-9-10-S4.pdf]

#### Additional file 4. List of primers used for cloning of the FPs

|    | <b>Primer</b>   | <b>att sites</b> | <b>Sequence</b>                                           |
|----|-----------------|------------------|-----------------------------------------------------------|
| 1  | Dendra_4-1_F    | attB4            | GGGGACAACCTTTGTATAGAAAAGTTGCT ATGAACACTCCTGGAATC          |
| 2  | Dendra_4-1_R    | attB1            | GGGGACTGCTTTTTTTGTACAAACTTGC CCAAACCTGTGATGGGAG           |
| 3  | Dendra_1-2_F    | attB1            | GGGGACAAGTTTGTACAAAAAAGCAGGCTTA ATGAACACTCCTGGAATC        |
| 4  | Dendra_1-2_R    | attB2            | GGGGACCACTTTGTACAAGAAAGCTGGGTA CCAAACCTGTGATGGGAG         |
| 5  | Dendra *_1-2_F  | attB1            | GGGGACAAGTTTGTACAAAAAAGCAGGCTTA ATGAACACTCCTGGAATCAATCT   |
| 6  | Dendra *_1-2_R  | attB2            | GGGGACCACTTTGTACAAGAAAGCTGGGTA TTACCAAACCTGTGATGG         |
| 7  | Dendra *_2-3_F  | attB2            | GGGGACAGCTTTCTTGTACAAAGTGGCT ATGAACACTCCTGGAATC           |
| 8  | Dendra *_2-3_R  | attB3            | GGGGACAACCTTTGTATAATAAAGTTGC TTACCAAACCTGTGATGG           |
| 9  | Venus_4-1_F     | attB4            | GGGGACAACCTTTGTATAGAAAAGTTGCT ATGGTGAGCAAGGGCGAG          |
| 10 | Venus_4-1_R     | attB1            | GGGGACTGCTTTTTTTGTACAAACTTGC CTTGTACAGCTCGTCCAT           |
| 11 | Venus_1-2_F     | attB1            | GGGGACAAGTTTGTACAAAAAAGCAGGCTTA ATGGTGAGCAAGGGCGAG        |
| 12 | Venus_1-2_R     | attB2            | GGGGACCACTTTGTACAAGAAAGCTGGGTA CTTGTACAGCTCGTCCATGCC      |
| 13 | Venus *_1-2_F   | attB1            | GGGGACAAGTTTGTACAAAAAAGCAGGCTTA ATGGTGAGCAAGGGCGAG        |
| 14 | Venus *_1-2_R   | attB2            | GGGGACCACTTTGTACAAGAAAGCTGGGTA TTACTIONGTACAGCTCGTCCATGCC |
| 15 | Venus *_2-3_F   | attB2            | GGGGACAGCTTTCTTGTACAAAGTGGCT ATGGTGAGCAAGGGCGAG           |
| 16 | Venus *_2-3_R   | attB3            | GGGGACAACCTTTGTATAATAAAGTTGC TTACTIONGTACAGCTCGTCCATGCC   |
| 17 | mCherry_4-1_F   | attB4            | GGGGACAACCTTTGTATAGAAAAGTTGCT ATGGTGAGCAAGGGCGAG          |
| 18 | mCherry_4-1_R   | attB1            | GGGGACTGCTTTTTTTGTACAAACTTGC CTTGTACAGCTCCTCCAT           |
| 19 | mCherry_1-2_F   | attB1            | GGGGACAAGTTTGTACAAAAAAGCAGGCTTA ATGGTGAGCAAGGGCGAG        |
| 20 | mCherry_1-2_R   | attB2            | GGGGACCACTTTGTACAAGAAAGCTGGGTA CTTGTACAGCTCCTCCATGCC      |
| 21 | mCherry *_1-2_F | attB1            | GGGGACAAGTTTGTACAAAAAAGCAGGCTTA ATGGTGAGCAAGGGCGAG        |
| 22 | mCherry *_1-2_R | attB2            | GGGGACCACTTTGTACAAGAAAGCTGGGTA TTACTIONGTACAGCTCCTCCATGCC |
| 23 | mCherry *_2-3_F | attB2            | GGGGACAGCTTTCTTGTACAAAGTGGCT ATGGTGAGCAAGGGCGAG           |
| 24 | mCherry *_2-3_R | attB3            | GGGGACAACCTTTGTATAATAAAGTTGC TTACTIONGTACAGCTCCTCCATGCC   |
| 25 | TagRFP_4-1_F    | attB4            | GGGGACAACCTTTGTATAGAAAAGTTGCT ATGGTGTCTAAGGGCGAA          |
| 26 | TagRFP_4-1_R    | attB1            | GGGGACTGCTTTTTTTGTACAAACTTGC ATTAAGTTTGTGCCCCAGTTT        |
| 27 | TagRFP_1-2_F    | attB1            | GGGGACAAGTTTGTACAAAAAAGCAGGCTTA ATGGTGTCTAAGGGCGAA        |
| 28 | TagRFP_1-2_R    | attB2            | GGGGACCACTTTGTACAAGAAAGCTGGGTA ATTAAGTTTGTGCCCCAG         |
| 29 | TagRFP *_1-2_F  | attB1            | GGGGACAAGTTTGTACAAAAAAGCAGGCTTA ATGGTGTCTAAGGGCGAA        |

|                         |                   |       |                                                    |
|-------------------------|-------------------|-------|----------------------------------------------------|
| 30                      | TagRFP *_1-2_ R   | attB2 | GGGGACCACTTTGTACAAGAAAGCTGGGTA TCAATTAAGTTTGTGCC   |
| 31                      | TagRFP *_2-3_ F   | attB2 | GGGGACAGCTTCTTGTACAAAAGTGGCT ATGGTGTCTAAGGGCGAA    |
| 32                      | TagRFP *_2-3_ R   | attB3 | GGGGACAACCTTTGTATAATAAAGTTGC TCAATTAAGTTTGTGCC     |
| 33                      | Cerulean_4-1_ F   | attB4 | GGGGACAACCTTTGTATAGAAAAGTTGCT ATGGTGAGCAAGGGCGAG   |
| 34                      | Cerulean_4-1_ R   | attB1 | GGGGACTGCTTTTTTGTACAAACTTGC ACTGGGTGCTCAGGTAGT     |
| 35                      | Cerulean_1-2_ F   | attB1 | GGGGACAAGTTTGTACAAAAAAGCAGGCTTA ATGGTGAGCAAGGGCGAG |
| 36                      | Cerulean_1-2_ R   | attB2 | GGGGACCACTTTGTACAAGAAAGCTGGGTA ACTGGGTGCTCAGGTAGT  |
| 37                      | Cerulean *_1-2_ F | attB1 | GGGGACAAGTTTGTACAAAAAAGCAGGCTTA ATGGTGAGCAAGGGCGAG |
| 38                      | Cerulean *_1-2_ R | attB2 | GGGGACCACTTTGTACAAGAAAGCTGGGTA TTAAGTGGGTGCTCAGGT  |
| 39                      | Cerulean *_2-3_ F | attB2 | GGGGACAGCTTCTTGTACAAAAGTGGCT ATGGTGAGCAAGGGCGAG    |
| 40                      | Cerulean *_2-3_ R | attB3 | GGGGACAACCTTTGTATAATAAAGTTGC TTAAGTGGGTGCTCAGGT    |
| *- indicates STOP codon |                   |       |                                                    |
